# Supplementary material for: The IL23R A/Gln381 Allele Promotes IL-23 Unresponsiveness in Human Memory T-Helper 17 Cells and Impairs Th17 Responses in Psoriasis Patients
Source: PubMed Central journal article supplement — J Invest Dermatol. 2013 May 16;133(10):2381–9. doi: 10.1038/jid.2013.170 (PMC3778837; doi:10.1038/jid.2013.170), 2013-05-16
Supplement: jid2013170x1.pdf [file jid2013170x1.pdf]

**The IL23R A/Gln381 allele promotes IL-23 unresponsiveness in human memory T helper17 cells and impairs Th17 responses in psoriasis patients**

P Di Meglio, F Villanova, L Napolitano, I Tosi, M Terranova Barberio, RK Mak, S Nutland,  
CH Smith, JNWN Barker, JA Todd, FO Nestle

Supplemental Materials

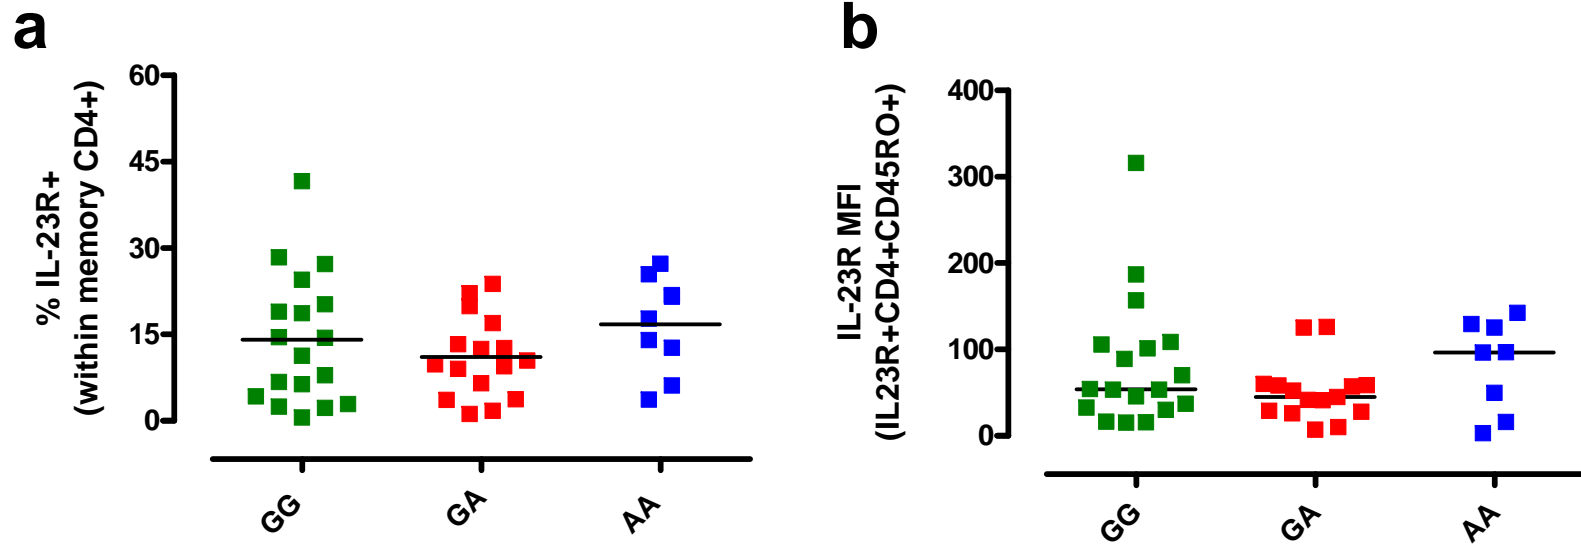

**Figure S1**

**IL23R A/Gln381 heterozygous and homozygous carriers have normal frequency of IL-23R+ memory T cells and IL-23R surface expression**

**a)** Frequency of IL-23R+ cells within memory CD4+ T cells in healthy individuals homozygous for the common G allele (GG, green squares), heterozygous GA (red squares), or homozygous for the protective A allele (AA, blue squares).

**b)** IL23R Median Fluorescent Intensity (MFI) within IL-23R+ memory T cells in GG (green), GA (red) and AA (blue) healthy individuals. Each symbol represents one individual donor. Horizontal bars represent mean (a) or median (b).

One-way ANOVA, followed by Bonferroni post test (a) or Kruskal-Wallis, followed by Dunn's Multiple Comparison test (b) was performed yielding  $P > 0.05$  for all comparisons.

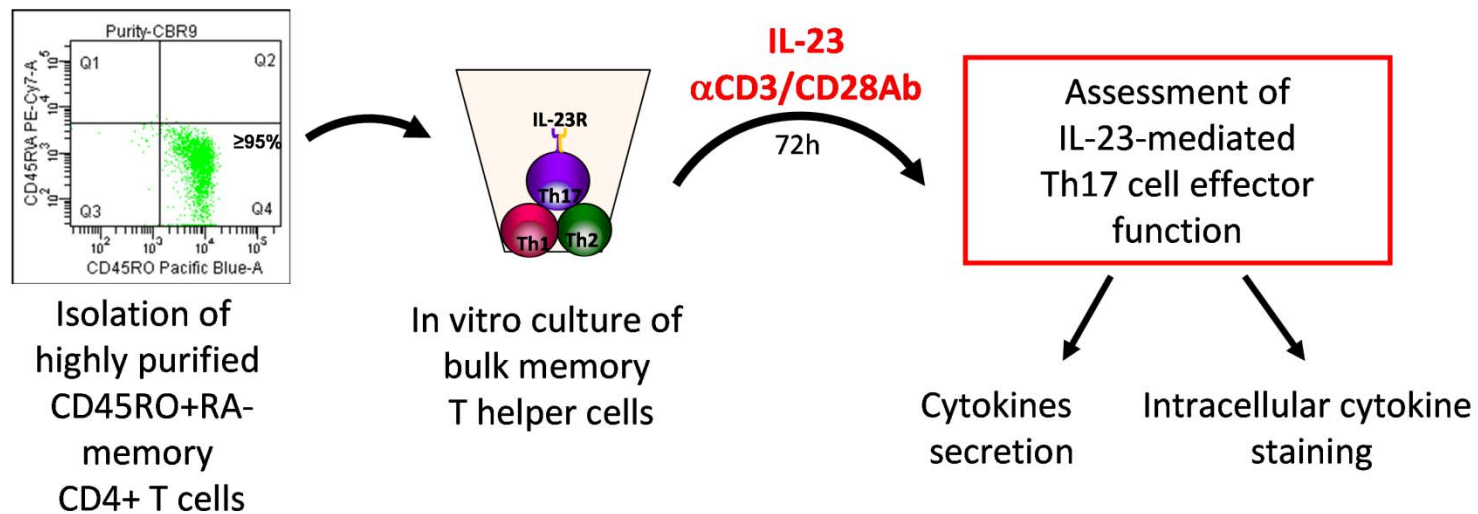

## Figure S2

### Memory cell experimental layout

Memory (CD4+CD45RO+RA-) T cells were obtained by incubation with Rosette Sep Human CD4+T cells enrichment cocktail followed by centrifugation through Lymphoprep and further purification by negative selection using magnetic beads and anti-CD45RA. Purity of CD45RO+CD45RA- T cells was checked by FACS and considered acceptable when over 95%. To assess IL-23-mediated Th17 cell effector function, cells were stimulated in duplicate with anti CD3/CD28 beads (1 bead/10 cells), with or without IL-23 (100 ng/ml) for 72 hours. Thereafter, cells were spun down and cell supernatants were taken to measure cytokine secretion. Cells from each condition were pulled together, fresh complete medium was added and cells were stimulated for intracellular cytokine staining with PMA (10 ng/ml) and Ionomycin (500 ng/ml) in the presence of monensin (3 $\mu$ M) and Brefeldin A (10 ng/ml) for 6 hours.

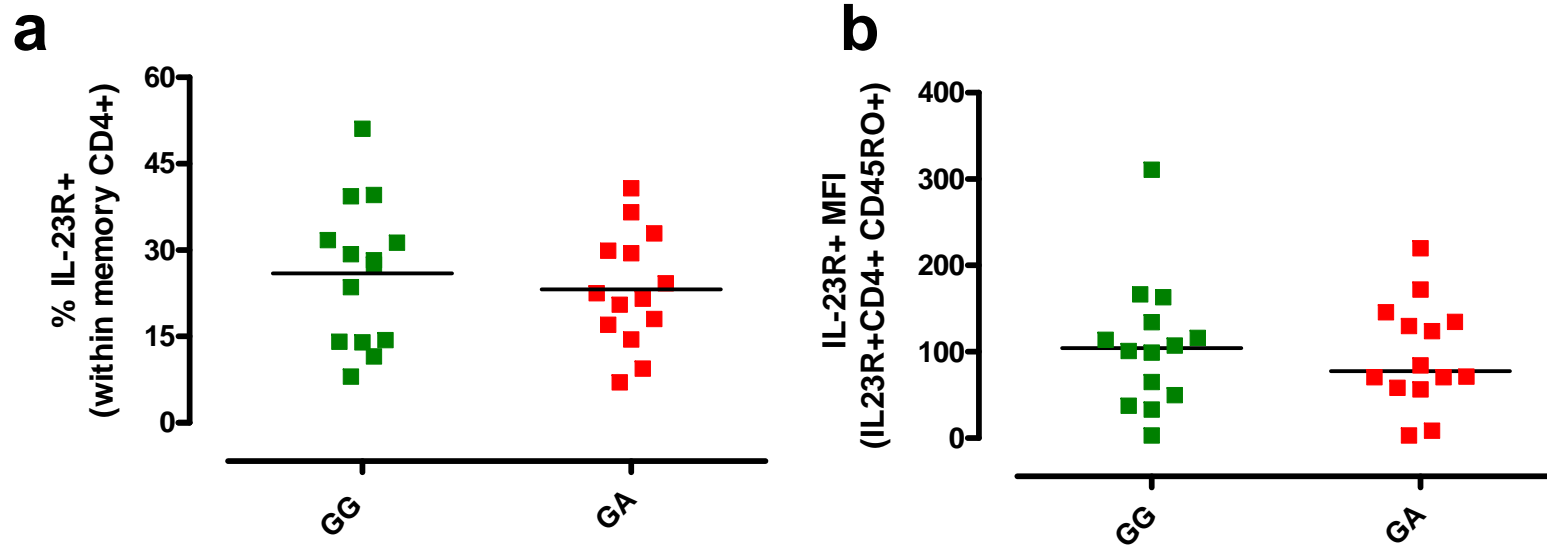

**Figure S3**

**IL23R A/Gln381 heterozygous psoriasis patients have normal frequency of IL-23R+ memory T cells and IL-23R surface expression**

**a)** Frequency of IL-23R+ cells within memory CD4+ T cells in psoriasis patients homozygous for the common G allele (GG, green squares) and heterozygous for the protective A allele (GA, red squares). **b)** IL-23R Median Fluorescent Intensity (MFI) within IL23R+ memory T cells in GG (green), GA (red) psoriasis patients. Each symbol represents one individual donor. Horizontal bars represent mean (a) or median (b). Unpaired t test (a) or Mann Whitney (b) was performed yielding  $P > 0.05$  for all comparisons.

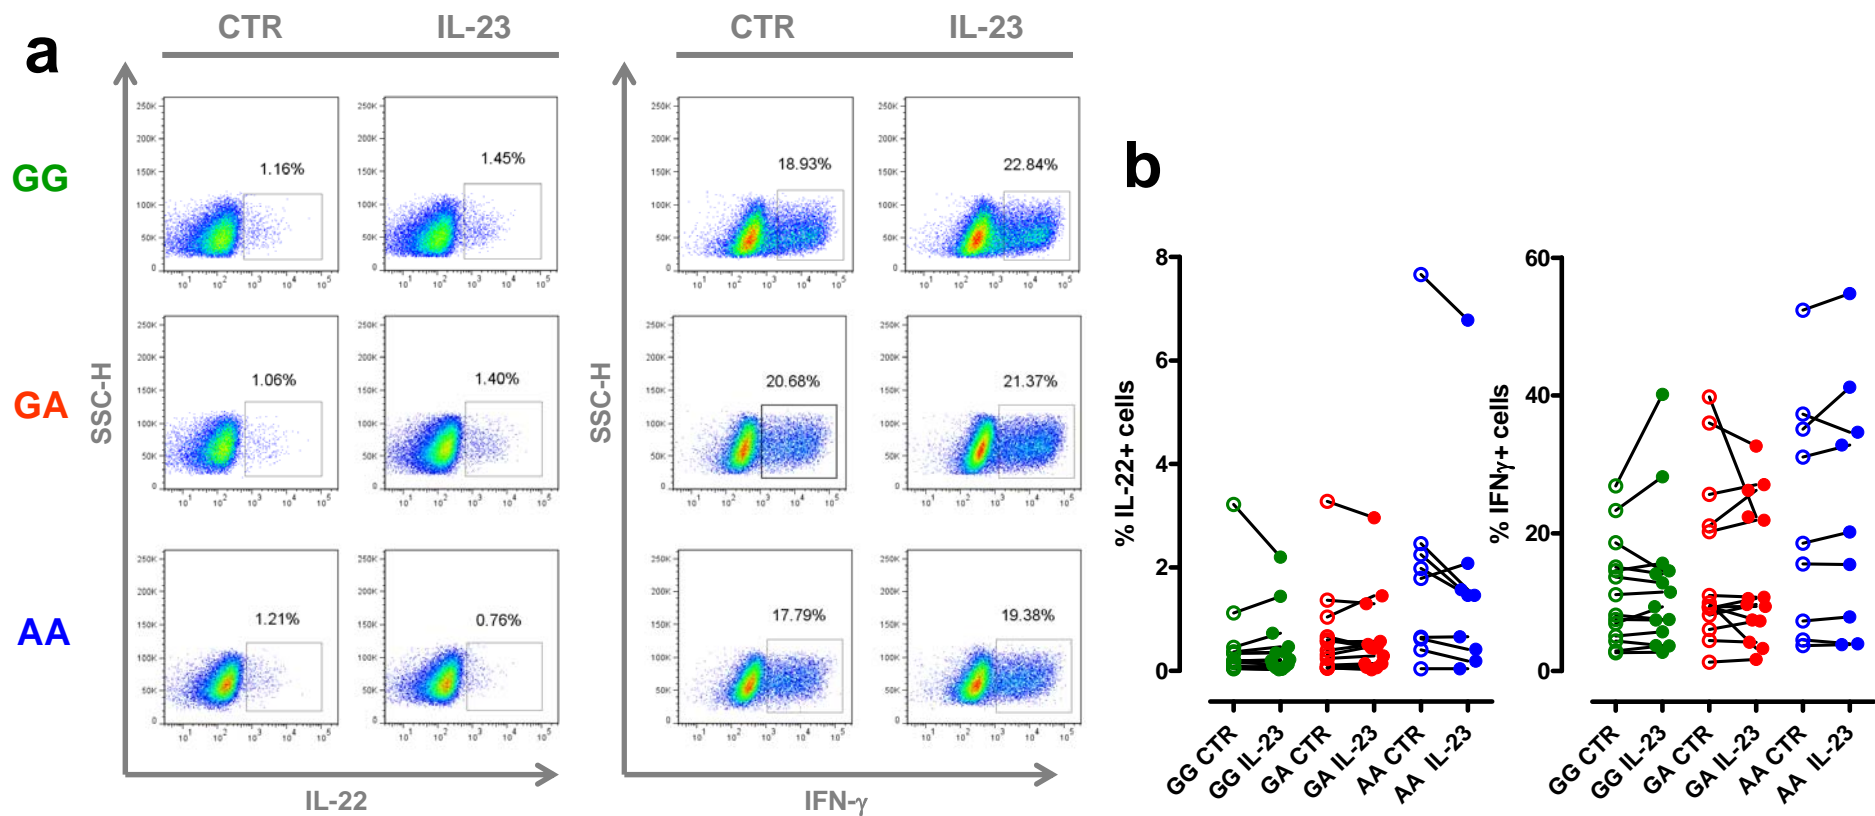

**Figure S4**

**Effect of IL23R A/Glu381 allele on IL-23-driven survival/expansion of human memory Th cells**

Memory CD4+ T cells from healthy individuals homozygous for the common G allele (GG, green), heterozygous GA (red), or homozygous for the protective A allele (AA, blue), cultured with or without IL-23 for 72h, were assayed for intracellular cytokines IFN- $\gamma$  and IL-22, following PMA/Ionomycin stimulation for 6 h. **a)** Representative dot plots of GG, GA and AA individual donors. **b)** Each connected symbol represents paired samples from one individual donor. Wilcoxon signed rank test was performed.  $P > 0.05$  for all paired comparisons

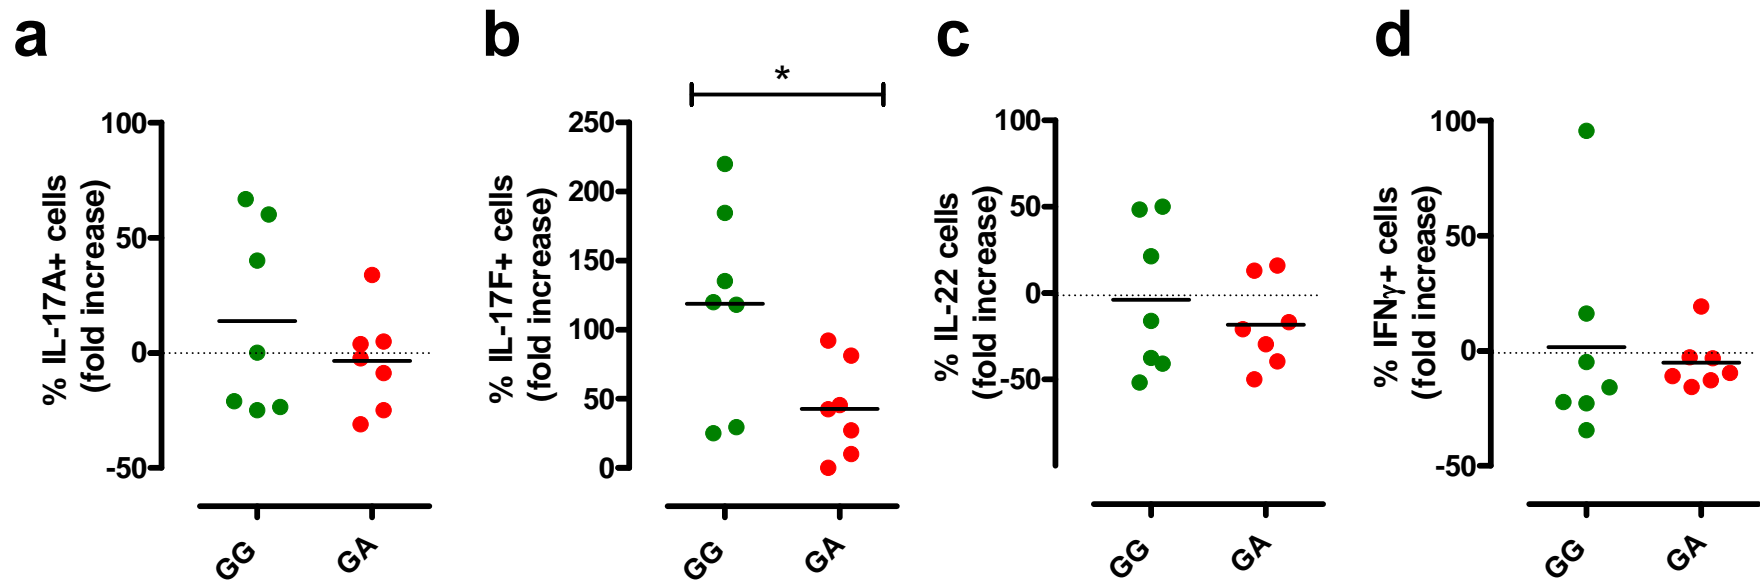

**Figure S5**

**IL23R A/Glu381 allele impairs IL-23-driven survival/expansion of human memory T helper 17 cells from psoriatic patients**

Memory CD4<sup>+</sup> T cells from psoriasis patients homozygous for the common G allele (GG, green dots) or heterozygous for the protective A allele GA (red dots) cultured with or without IL-23 for 72h, were assayed for intracellular cytokines IL-17A (a), IL-17F (b), IL-22 (c) and IFN- $\gamma$  (d), following PMA/Ionomycin stimulation for 6 h. Data are shown as fold increase in frequency of cytokines producing cells in the presence of IL-23. Each dots represents an individual donor. Mann Whitney test was performed, \*P < 0.05. P > 0.05 for all other comparisons.

| Donors                                 | Genotype              |                       |                   |
|----------------------------------------|-----------------------|-----------------------|-------------------|
|                                        | GG                    | GA                    | AA                |
| <b>Healthy volunteers</b>              | <b>18<sup>1</sup></b> | <b>18<sup>2</sup></b> | <b>9</b>          |
| <b>mean age (range) yrs</b>            | <b>42 (24-66)</b>     | <b>42 (26-67)</b>     | <b>47 (26-46)</b> |
| <b>males</b>                           | <b>8</b>              | <b>8</b>              | <b>6</b>          |
| <b>females</b>                         | <b>10</b>             | <b>10</b>             | <b>3</b>          |
| <b>Psoriatic patients</b>              | <b>40</b>             | <b>18</b>             | <b>0</b>          |
| <b>mean age (range) yrs</b>            | <b>44 (25-76)</b>     | <b>43 (30-62)</b>     | <b>-</b>          |
| <b>males</b>                           | <b>30</b>             | <b>14</b>             | <b>-</b>          |
| <b>females</b>                         | <b>10</b>             | <b>4</b>              | <b>-</b>          |
| <b>Psoriatic Arthritis<sup>3</sup></b> | <b>6</b>              | <b>5</b>              | <b>-</b>          |

**Table S1**

**Demographics of healthy donors and psoriasis patients used in functional experiments**

<sup>1</sup> of which 3 used in Di Meglio et al., PLoS ONE 2011

<sup>2</sup> of which 4 used in Di Meglio et al., PLoS ONE 2011

<sup>3</sup> Info available only for 35 GG and 16 GA

| Genotype | ID  | Gender | Age yrs | Treatment                 |
|----------|-----|--------|---------|---------------------------|
| GG       | P1  | M      | 62      | etanercept                |
|          | P2  | M      | 54      | methotrexate + etanercept |
|          | P3  | M      | 50      | topical                   |
|          | P4  | F      | 35      | topical                   |
|          | P5  | M      | 40      | topical                   |
|          | P6  | M      | 55      | etanercept                |
|          | P7  | F      | 43      | fumaric acid ester        |
|          | P8  | M      | 29      | retinoid                  |
|          | P9  | M      | 32      | cyclosporine              |
|          | P10 | M      | 28      | adalimumab                |
|          | P11 | M      | 66      | methotrexate              |
|          | P12 | M      | 39      | cyclosporine              |
|          | P13 | F      | 65      | retinoid                  |
|          | P14 | M      | 36      | phototherapy              |
| GA       | P15 | M      | 58      | etanercept                |
|          | P16 | M      | 61      | methotrexate + etanercept |
|          | P17 | M      | 56      | topical                   |
|          | P18 | F      | 30      | topical                   |
|          | P19 | M      | 44      | topical                   |
|          | P20 | M      | 48      | etanercept                |
|          | P21 | F      | 54      | fumaric acid ester        |
|          | P22 | F      | 34      | retinoid                  |
|          | P23 | M      | 35      | cyclosporine              |
|          | P24 | M      | 29      | etanercept                |
|          | P25 | M      | 63      | methotrexate              |
|          | P26 | M      | 44      | cyclosporine              |
|          | P27 | M      | 54      | retinoid                  |
|          | P28 | M      | 35      | phototherapy              |

**Table S2**

**Demographics of psoriasis patients used in PBMCs experiments (Fig.4c)**



| <b>Genotype</b> | <b>ID</b>              | <b>Gender</b> | <b>Age yrs</b> | <b>Treatment</b>                 |
|-----------------|------------------------|---------------|----------------|----------------------------------|
| <b>GG</b>       | <b>P9</b>              | <b>M</b>      | <b>32</b>      | <b>cyclosporine</b>              |
|                 | <b>P29</b>             | <b>F</b>      | <b>43</b>      | <b>methotrexate</b>              |
|                 | <b>P30</b>             | <b>M</b>      | <b>42</b>      | <b>methotrexate</b>              |
|                 | <b>P31</b>             | <b>M</b>      | <b>55</b>      | <b>methotrexate</b>              |
|                 | <b>P32</b>             | <b>F</b>      | <b>57</b>      | <b>infliximab</b>                |
|                 | <b>P33</b>             | <b>M</b>      | <b>54</b>      | <b>etanercept</b>                |
|                 | <b>P34</b>             | <b>M</b>      | <b>50</b>      | <b>methotrexate + adalimumab</b> |
| <b>GA</b>       | <b>P15</b>             | <b>M</b>      | <b>58</b>      | <b>etanercept</b>                |
|                 | <b>P16</b>             | <b>M</b>      | <b>61</b>      | <b>methotrexate + etanercept</b> |
|                 | <b>P22<sup>1</sup></b> | <b>F</b>      | <b>37</b>      | <b>methotrexate</b>              |
|                 | <b>P23</b>             | <b>M</b>      | <b>35</b>      | <b>cyclosporine</b>              |
|                 | <b>P25</b>             | <b>M</b>      | <b>63</b>      | <b>methotrexate</b>              |
|                 | <b>P35</b>             | <b>M</b>      | <b>35</b>      | <b>methotrexate</b>              |
|                 | <b>P36</b>             | <b>F</b>      | <b>37</b>      | <b>adalimumab</b>                |

**Table S3**

**Demographics of psoriasis patients used in memory T cells experiments (Fig. 5a)**

<sup>1</sup> Different collection as compared to table S2

| Genotype | ID                 | Gender | Age     | Treatment                 |
|----------|--------------------|--------|---------|---------------------------|
| GG       | P2                 | M      | 54      | methotrexate + etanercept |
|          | P10 <sup>1</sup>   | M      | 27      | etanercept                |
|          | P30 <sup>2</sup>   | M      | 39      | methotrexate              |
|          | P31 <sup>2</sup>   | M      | 51      | topical                   |
|          | P34                | M      | 50      | methotrexate + adalimumab |
|          | P37                | M      | 30      | topical                   |
|          | P38                | M      | 32      | none                      |
|          | P39                | M      | 37      | none                      |
|          | P40                | M      | 42      | none                      |
|          | P41                | M      | 37      | none                      |
|          | P42                | F      | 72      | methotrexate              |
|          | P43                | M      | 43      | adalimumab                |
|          | P44                | M      | 42      | none                      |
|          | P45                | M      | 74      | methotrexate              |
|          | P46                | F      | 30      | topical                   |
|          | P47                | F      | 76      | none                      |
|          | P48                | F      | 25      | none                      |
|          | P49                | M      | 36      | none                      |
|          | P50                | M      | 40      | topical                   |
|          | P51                | M      | 39      | topical                   |
| P52      | F                  | 29     | topical |                           |
| P53      | M                  | 41     | topical |                           |
| P54      | M                  | 29     | none    |                           |
| P55      | M                  | 49     | topical |                           |
| P56      | M                  | NA     | none    |                           |
| GA       | P16                | M      | 61      | methotrexate + etanercept |
|          | P20                | M      | 48      | etanercept                |
|          | P21 <sup>1</sup>   | F      | 56      | adalimumab                |
|          | P25 <sup>1,2</sup> | M      | 60      | topical                   |
|          | P26                | M      | 44      | cyclosporine              |
|          | P57                | M      | 34      | topical                   |
|          | P58                | M      | 34      | topical                   |

**Table S4**

**Demographics of psoriasis patients used in skin cytokines mRNA correlation analysis (Fig. 5b)**

<sup>1</sup> Different collection as compared to Table S2

NA= Not Available

<sup>2</sup> Different collection as compared to Table S3

| Antigen           | Fluorochrome      | Company                       |
|-------------------|-------------------|-------------------------------|
| CD3               | PE-Cy5            | BioLegend (San Diego, CA)     |
| CD4               | Alexa Fluor 700   | BioLegend (San Diego, CA)     |
| CD45RO            | Pacific Blue      | BioLegend (San Diego, CA)     |
| IFN-g             | PE-Cy7            | BioLegend (San Diego, CA)     |
| IFN-g             | Alexa Fluor 700   | BioLegend (San Diego, CA)     |
| IL-17A            | FITC              | eBioscience (San Diego, CA)   |
| IL-17F            | PerCP e-Fluor 710 | eBioscience (San Diego, CA)   |
| IL-22             | Alexa 647         | eBioscience (San Diego, CA)   |
| IL-23R            | biotynilated      | R&D Systems (Minneapolis, MN) |
| Secondary reagent | Fluorochrome      | Company                       |
| Streptavidin      | APC-Cy7           | BD Biosciences (San Jose, CA) |

**Table S5**  
**Antibodies used in multiparameter flow cytometry experiments**
